# Supplementary material
Source: PubMed Central journal article supplement (PMC3575708)
Supplement: supp_125.23.5733_JCS108969.pdf [file supp_125.23.5733_JCS108969.pdf]

**A**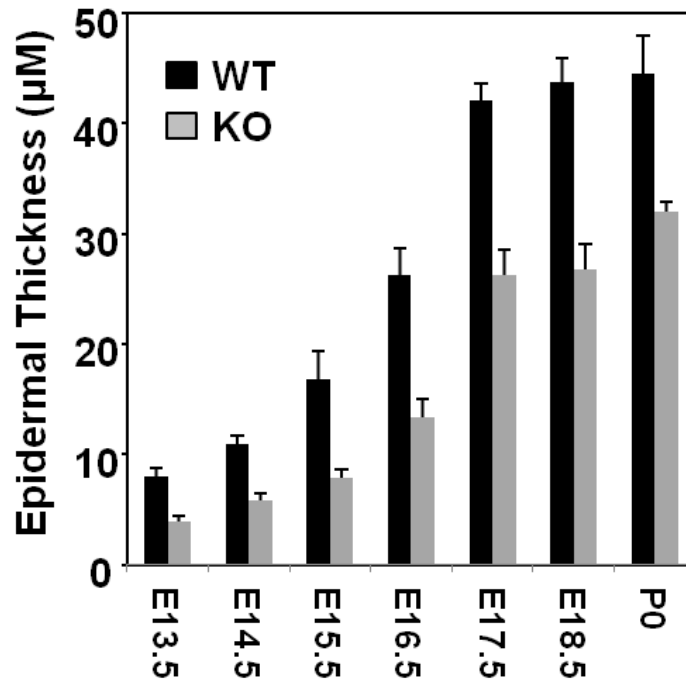**B**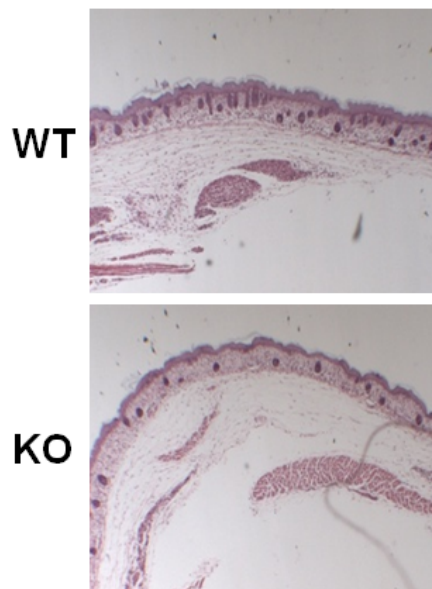**C**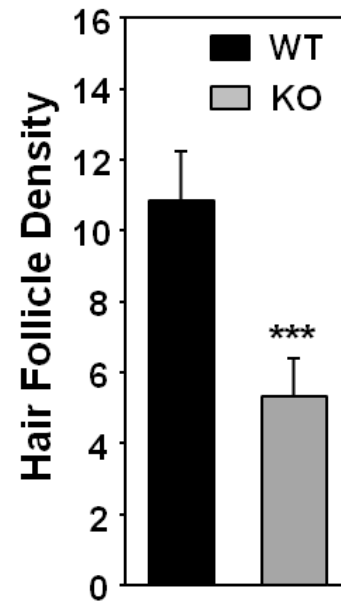

**Fig. S1. Ctip2-null epidermis is hypotrophic during development.** (A) Epidermal thickness was measured on Hematoxylin-Eosin-stained sections of dorsal skin collected from wild-type (WT) and Ctip2-null (KO) embryos at indicated embryonic days. (B-C) Decreased hair follicle density in Ctip2-null E18.5 epidermis. (B) Hematoxylin-Eosin-stained sections of dorsal skin biopsies from WT and KO embryos at E18.5. (C) Hair follicle density per field was counted on the Hematoxylin-Eosin-stained sections from E18.5 WT (n=3) and KO (n=3) dorsal skin. Ten fields per section (3 sections/slide) from each of the WT and KO embryos were measured. WT, black bars; KO, gray bars. The results are representative of at least three independent studies.

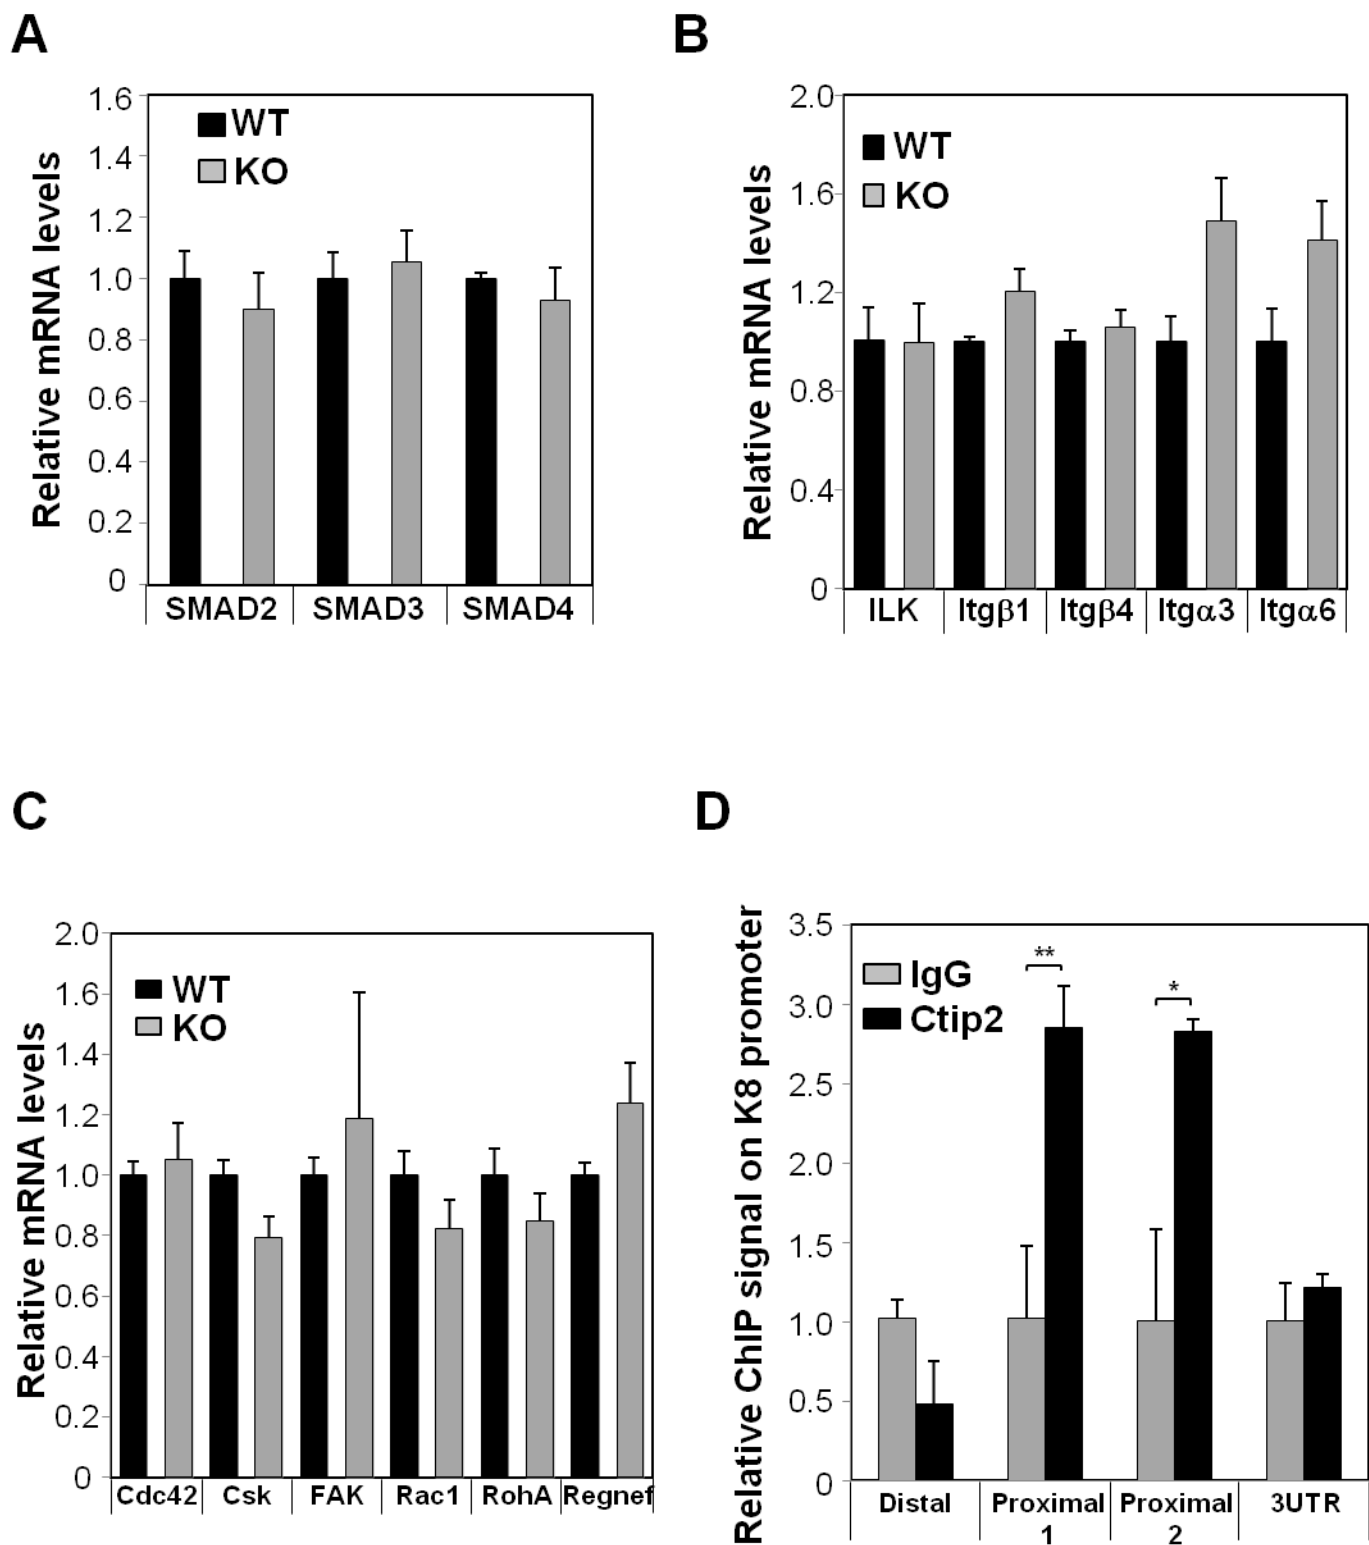

**Fig. S2. The expression of genes regulating cytoskeletal organization or EMT in the absence of Ctip2.** (A) Expression of SMAD family genes in Ctip2-null keratinocytes. Cultured keratinocytes were harvested for RT-qPCR analyses of expression of SMADs, including SMAD2, SMAD3 and SMAD4 as indicated. SMADs mRNA expression level was calculated relative to the expression of a house keeping gene, GAPDH. (B-C) Expression of genes regulating cytoskeletal organization is unaltered in Ctip2-null keratinocytes. Cultured keratinocytes were harvested from WT and Ctip2 KO keratinocytes for RT-qPCR analyses of integrin family genes, including ILK, Itgb1, Itgb4, Itga3 and Itga6 (B), as well as small GTPase related genes, including Cdc42, Csk, FAK, Rac1, RohA and Regn1 (C). Relative mRNA expression of each gene was calculated relative to the expression of a house keeping gene, GAPDH. (D) Ctip2 is recruited to the promoter of keratin 8 (K8). Subconfluent cultured keratinocytes were subjected to chromatin immunoprecipitation (ChIP) analyses using anti-Ctip2 antibody. IgG (rat) was used as a control. The purified chromatin DNA was analyzed by qPCR using specific primers covering either the distal promoter, two proximal promoters or 3'UTR region of K8 as indicated. Each bar represents the relative ratio to IgG of each ChIP. Bars represent mean expression levels  $\pm$  s.e.m. (n=3). WT, black bar; KO, gray bar. All experiments were performed in triplicates.

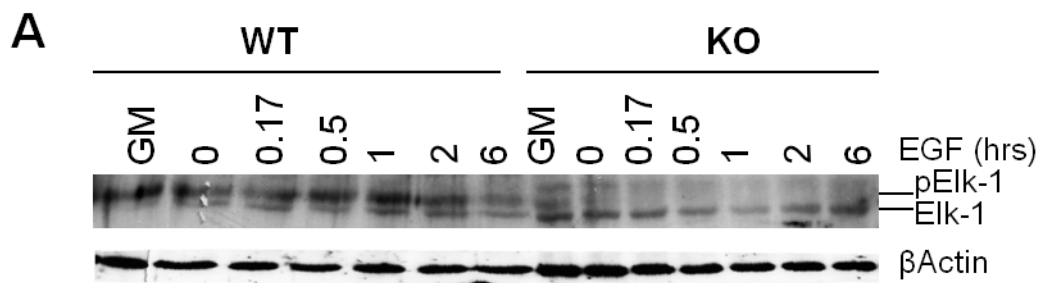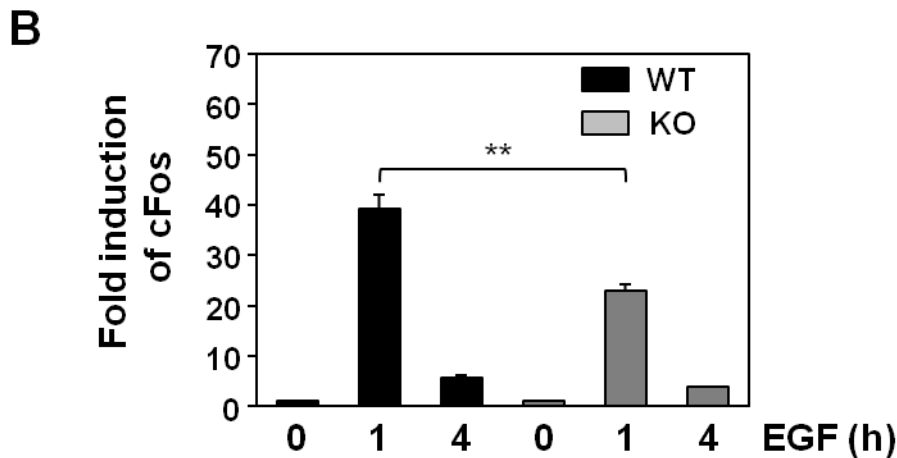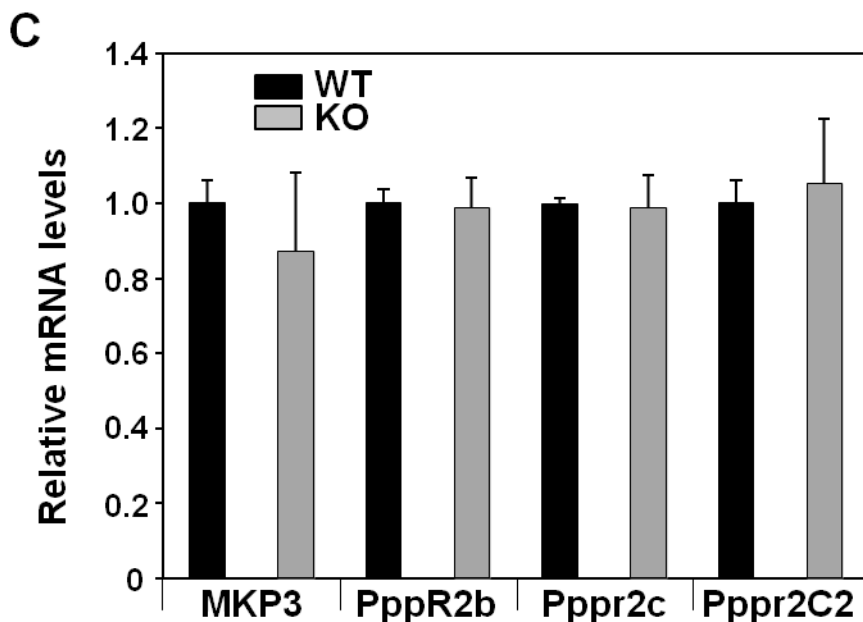

**Fig. S3. Induction of Elk-1 phosphorylation and cFos expression by EGF treatment in cultured keratinocytes.** (A) Impaired Elk-1 phosphorylation in Ctip2-null keratinocytes. Keratinocytes cultured under growth medium (GM) conditions were depleted of growth factors overnight then treated with 10 ng/ml EGF for indicated time before harvesting for immunoblotting analyses using indicated antibodies. Equal amounts of protein (10  $\mu$ g) were loaded in each well.  $\beta$ -actin was used as a loading control. (B) Cultured WT and KO keratinocytes were depleted of growth factors overnight then treated with 10 ng/ml EGF for indicated hrs before harvest for RT-qPCR analyses of cFos mRNA expression (normalized to GAPDH). Results are shown as mean  $\pm$  s.e.m. (n=3) of the relative cFos mRNA (\*\* $P$ <0.001). Statistical analyses were performed using the Student's un-paired  $t$ -test and GraphPad Prism software. (C) Expression of ERK phosphatases were unaltered in Ctip2-null keratinocytes. Cultured keratinocytes were harvested for RT-qPCR analyses of a group of ERK phosphatases, including MKP3, PppR2b, Pppr2c and Pppr2C2 as indicated. Relative mRNA expression of each gene was calculated relative to the expression of a house keeping gene, GAPDH. Bars represent mean expression levels  $\pm$  s.e.m. (n=3). WT, black bar; KO, gray bar. The results are representative of at least three independent studies.

**A**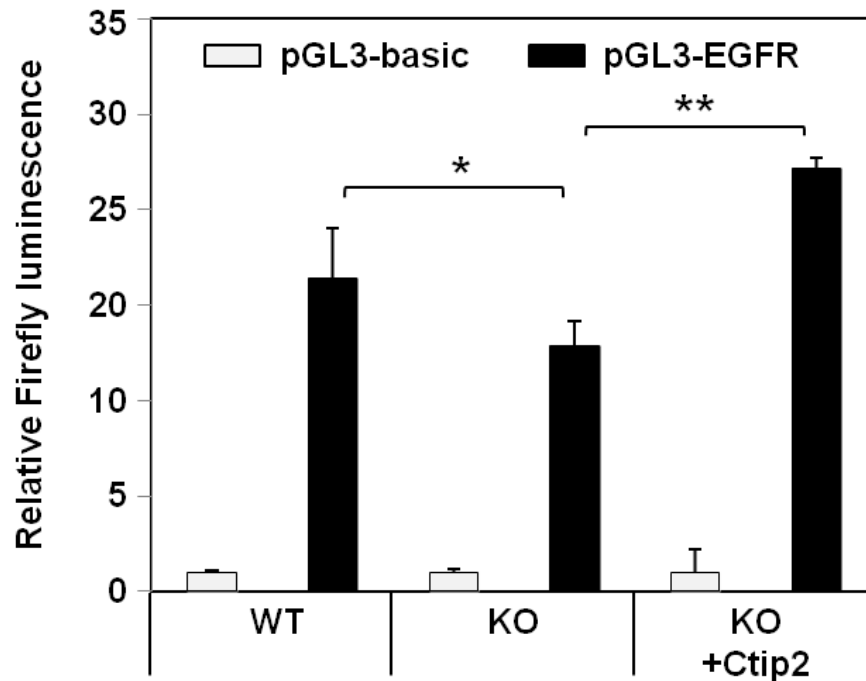**B**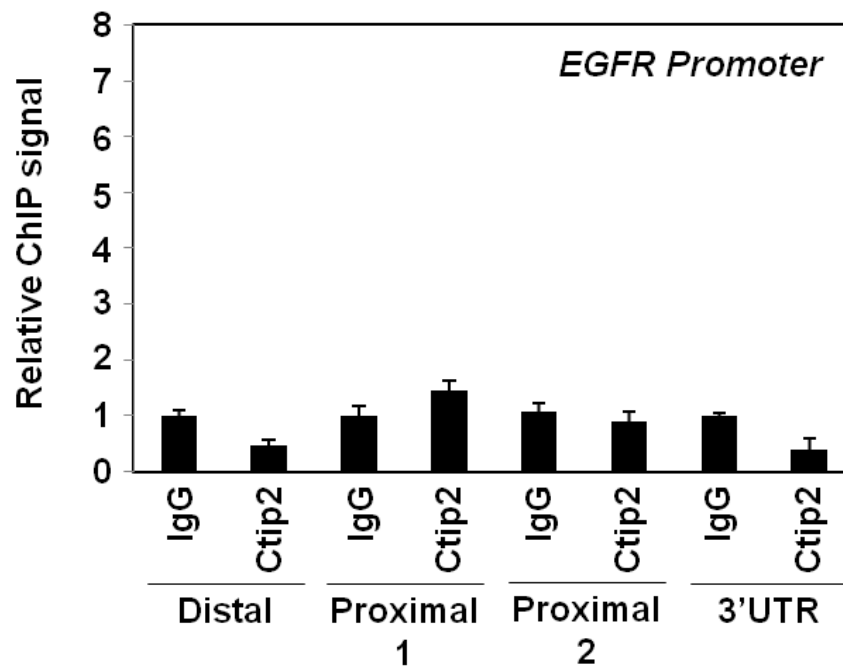

**Fig. S4. Regulation of EGFR promoter by Ctip2.** (A) Ctip2 positively regulates EGFR promoter in cultured keratinocytes. Wild-type (WT) and Ctip2-null (KO) keratinocytes were co-transfected with a promoterless luciferase construct (pGL3-basic) or luciferase reporter constructs bearing EGFR promoter with or without an expression vector encoding Ctip2 as indicated. Renilla luciferase construct driven by SV40 promoter was also co-transfected for normalization. Bars represent mean expression levels  $\pm$  s.e.m. (n=3) of the relative fold expression of firefly luciferase. Statistical significance was determined by Student's un-paired *t*-test using the GraphPad Prism software (\* $P$ <0.05; \*\* $P$ <0.01). (B) Negative controls for Ctip2 ChIP assays shown in Fig. 5F. ChIP assays were performed as described in Fig. 5F, except that they were performed using E16.5 epidermal keratinocytes from Ctip2 KO embryos. All experiments were performed in triplicates.

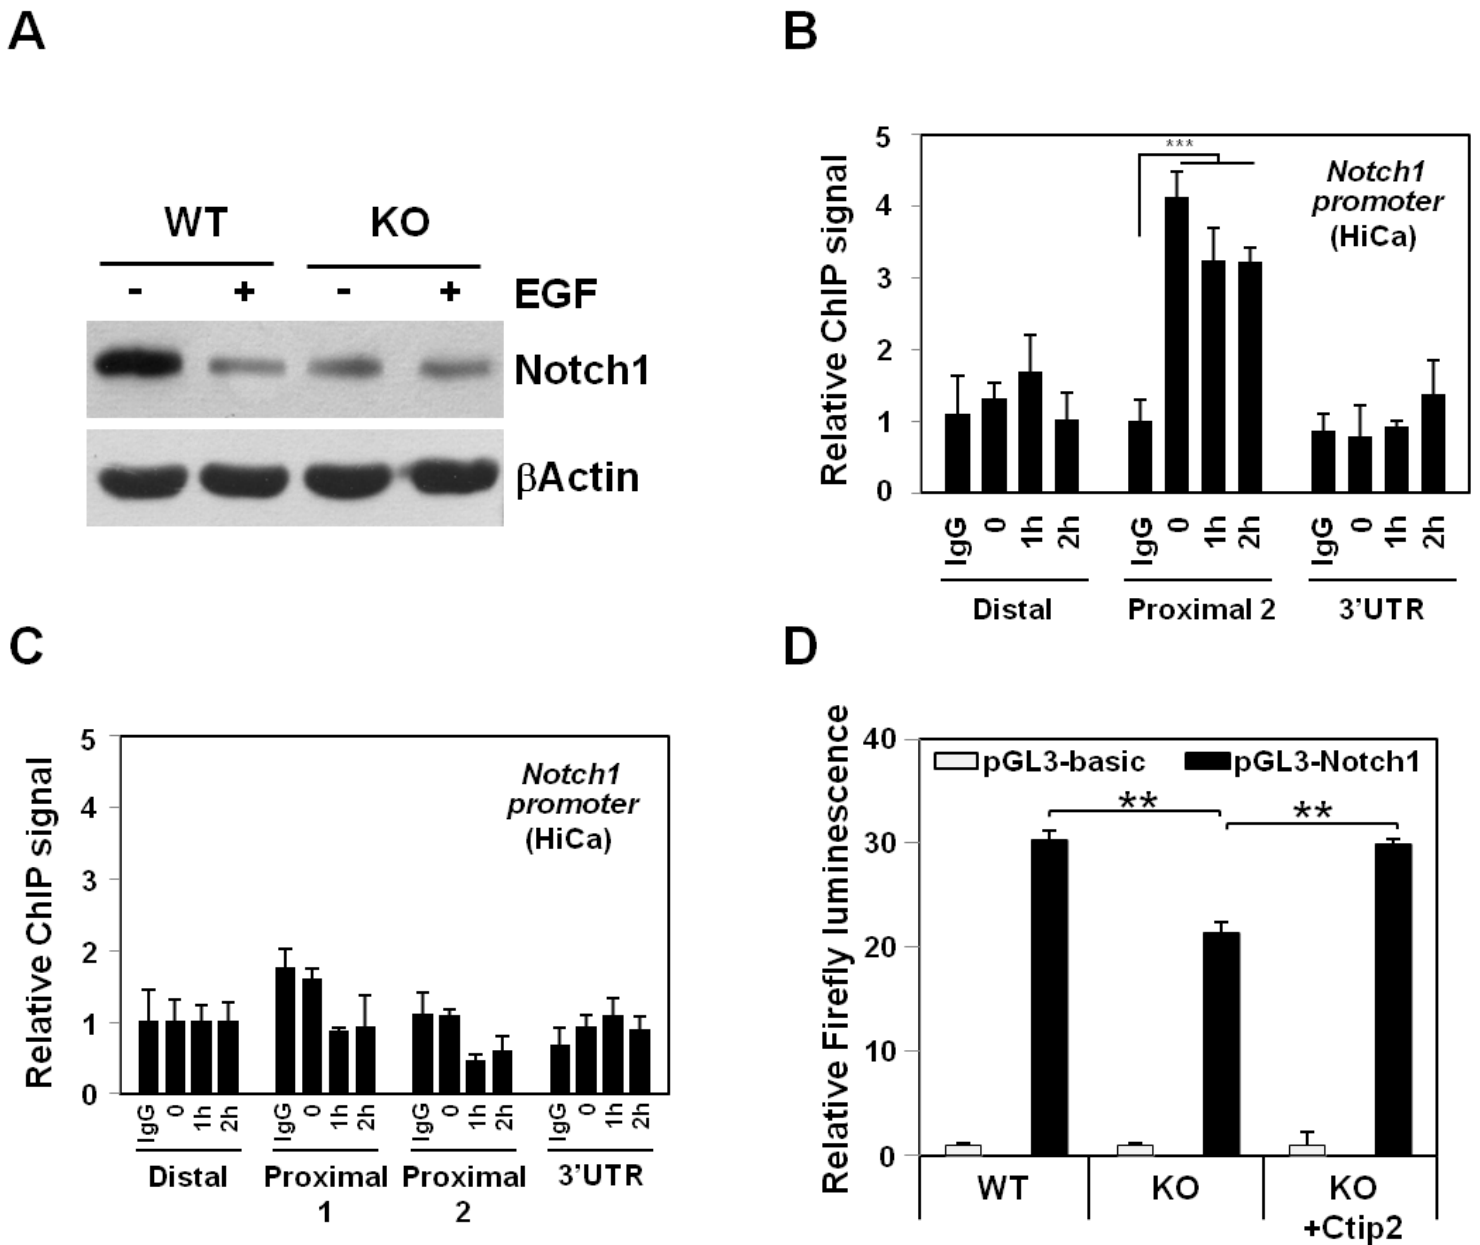

**Fig. S5. Coordinate regulation of Notch1 by Ctip2.** (A) Negative regulation of Notch1 expression by EGF signaling. Immunoblotting analyses of cell extracts from starved WT and KO keratinocytes treated with or without EGF using anti-Notch1 and anti-βactin antibodies as indicated. βactin was used as a loading control. (B) ChIP assays were performed in starved keratinocytes treated with 0.2 mM CaCl<sub>2</sub> as described in Fig. 6H. In addition, here we show Ctip2 ChIP results using an additional primer pairs for the proximal promoter of Notch1. (C) Negative controls for Ctip2 ChIP assays shown in Fig. 6H. ChIP assays were performed as described in Fig. 6H, except that it was performed using E16.5 epidermal keratinocytes from Ctip2 KO pups. (D) Ctip2 positively regulates Notch1 promoter in cultured keratinocytes. Wild-type (WT) and Ctip2-null (KO) keratinocytes were co-transfected with a promoterless luciferase construct (pGL3-basic) or luciferase reporter constructs bearing Notch1 promoter with or without an expression vector encoding Ctip2 as indicated. Relative firefly luminescence were displayed as described in Fig. S4A. Statistical significance was determined by Student's unpaired *t*-test using the GraphPad Prism software (\*\**P*<0.01). All experiments were performed in triplicates.

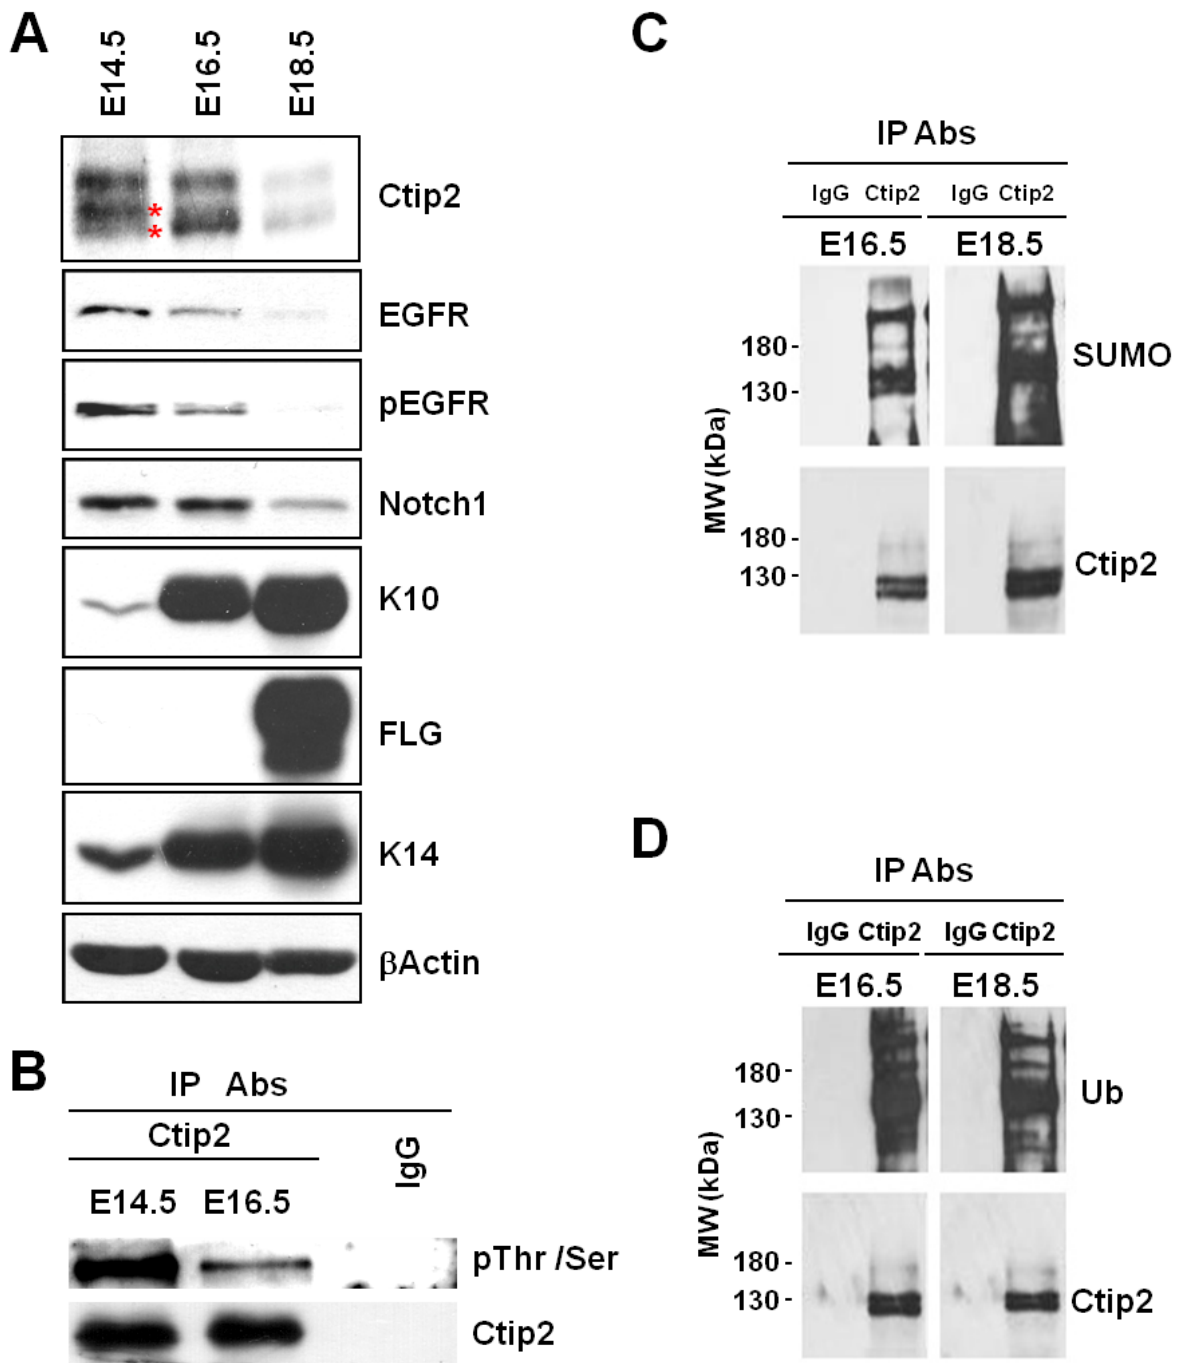

**Fig. S6. Endogenous Ctip2 is regulated by post-translational modifications in developing epidermal keratinocytes.** (A) Coordinated expression of Ctip2, EGFR, and Notch1 in developing mouse skin. Whole cell extracts prepared from dorsal skin biopsies collected at indicated embryonic stages of development were subjected to immunoblotting analyses using anti-Ctip2, -EGFR, -phospho-EGFR, -Notch1, -K10, -FLG, and -K14 antibodies. β-actin blot was shown as loading control. EGF-induced phosphorylation of Ctip2 leads to a small reduction in the electrophoretic mobility of Ctip2 on SDS-PAGE. Using E14.5 whole cell extract, we noticed an electrophoretic mobility shift of the smaller splice variant Ctip2 (indicated by asterisks; the lower asterisk indicates unmodified Ctip2 and the upper asterisk indicates the slower migrating Ctip2). These results suggest that Ctip2 is phosphorylated at E14.5, a stage at which EGFR signaling is highly activated (as indicated by pEGFR). The level of Ctip2 mobility shift decreased concomitantly with the decrease in the levels of EGFR phosphorylation. (B) Ctip2 is phosphorylated in the developing skin. E14.5 and E16.5 embryonic skin was harvested. IP experiments were carried out using anti-Ctip2 antibody or IgG as control and the immunoprecipitates were probed with an anti-phospho-threonine antibody to detect phosphorylated Ctip2 (the upper blot). The blot was then stripped and reprobed with the anti-Ctip2 antibody (the lower blot). (C-D) Ctip2 is SUMOylated (C) and ubiquitinated (D) in epidermal keratinocytes at E16.5 and E18.5. Lysates from epidermal keratinocytes at E16.5 or E18.5 were subjected to IP analyses using either Ctip2 antibody or IgG as control. Immunoprecipitates were probed with an anti-SUMO1 antibody to detect SUMOylated Ctip2 (C, the upper blot) or anti-ubiquitin antibody to detect ubiquitinated Ctip2 (D, the upper blot). The blots were then stripped and reprobed with the anti-Ctip2 antibody (the lower blots). All experiments were performed in triplicates.

**Table S1. Antibodies**

| <b>Antibody</b>                    | <b>Species</b> | <b>Source/Company</b>                             | <b>Dilution for IB</b>     | <b>Dilution for IF</b> |
|------------------------------------|----------------|---------------------------------------------------|----------------------------|------------------------|
| anti-Ctip2                         | rat            | Abcam<br>(Cambridge, MA)                          | 1:2000                     | 1:300                  |
| anti-PCNA                          | mouse          |                                                   | 1:3000                     |                        |
| anti-SUMO1                         | rabbit         |                                                   | 1:2000                     |                        |
| anti-Ubiquitin                     | mouse          | Enzo life science<br>(Plymouth Meeting, PA)       | 1:2000                     |                        |
| anti-E-Cadherin                    | rabbit         | Cell Signaling<br>(Danvers, MA)                   | 1:1000                     | 1:200                  |
| anti-phospho-EGFR                  | rabbit         |                                                   | 1:1000                     | 1:200                  |
| anti-EGFR                          | rabbit         |                                                   | 1:1000                     |                        |
| anti-Notch1                        | rabbit         |                                                   | 1:1000                     | 1:200                  |
| anti-phospho-ERK1/2                | rabbit         |                                                   | 1:2000                     |                        |
| anti-ERK1/2                        | rabbit         |                                                   | 1:2000                     |                        |
| anti-phospho- Elk-1<br>(Ser 383)   | rabbit         |                                                   | 1:1000                     |                        |
| anti-phospho-threonin<br>e/ serine | mouse          |                                                   | 1:2000                     |                        |
| anti-K14                           | rabbit         |                                                   | Covance<br>(Princeton, NJ) | 1:5000                 |
| anti-K10                           | rabbit         | 1:5000                                            |                            | 1:1000                 |
| anti-Filaggrin (FLG)               | rabbit         | 1:1000                                            |                            | 1:500                  |
| anti-Involucrin (INV)              | rabbit         | 1:1000                                            |                            | 1:1000                 |
| anti-Ioricrin (LOR)                | rabbit         | 1:1000                                            |                            | 1:1000                 |
| anti-bactin                        | rabbit         | Bethyl Laboratories<br>(Montgomery, TX)           | 1:2000                     |                        |
| anti-Ki67                          | mouse          | NovaCastra<br>(Bannockburn, IL)                   | 1:500                      | 1:100                  |
| TRITC-phalloidin                   |                | Sigma (St. Louis,<br>MO)                          | 1:1000                     |                        |
| anti-p21                           | mouse          | Santa Cruz (Santa<br>Cruz, CA)                    | 1:200                      |                        |
| anti-Keratin 8 (K8)                | rat            | Developmental<br>Studies Hybridoma<br>Bank (DSHB) | 1:1000                     |                        |

Abbreviation used: immunoblotting (IB); immunofluorescence (IF)

**Table S2. List of primers used for RT-qPCR**

| <b>Gene</b>   | <b>Strand</b> | <b>Primer sequence</b>      |
|---------------|---------------|-----------------------------|
| <b>Calb1</b>  | Forward       | AGCGGCTTCATCGAAACCG         |
|               | Reverse       | TCAGCATGAGGTCTGTGTACT       |
| <b>CasR</b>   | Forward       | AGCAGGTGACCTTCGATGAGT       |
|               | Reverse       | ACTTCCTTGAACACAATGGAGC      |
| <b>Cdc42</b>  | Forward       | CCCATCGGAATATGTACCAACTG     |
|               | Reverse       | CCAAGAGTGTATGGCTCTCCAC      |
| <b>c-Fos</b>  | Forward       | CGGGTTTCAACGCCGACTA         |
|               | Reverse       | TTGGCACTAGAGACGGACAGA       |
| <b>Csk</b>    | Forward       | TTCCCTTCTGCAAAGGAGATGT      |
|               | Reverse       | ACCAGGGCATAAAGGCTGAGT       |
| <b>EGFR</b>   | Forward       | GCCATCTGGGCCAAAGATACC       |
|               | Reverse       | GTCTTCGCATGAATAGGCCAAT      |
| <b>FAK</b>    | Forward       | CCATGCCCTCGAAAAGCTATG       |
|               | Reverse       | TGACGCATTGTTAAGGCTTCT       |
| <b>FLG</b>    | Forward       | GGACAACACTACAGGCAGTCTTGAAGA |
|               | Reverse       | CATTTGCATGAAGACTTCAGCG      |
| <b>HPRT</b>   | Forward       | GTTAAGCAGTACAGCCCCAAA       |
|               | Reverse       | AGGGCATATCCAACAACAACTT      |
| <b>K1</b>     | Forward       | TGGGAGATTTTCAGGAGGAGG       |
|               | Reverse       | GCCACACTCTTGGAGATGCTC       |
| <b>K8</b>     | Forward       | GATGAGATCCAACAGCGTACAG      |
|               | Reverse       | CATGTATGCTTCGTCCACATCC      |
| <b>K10</b>    | Forward       | GTCCACTGGTGTATGTGAATGT      |
|               | Reverse       | CCAGACCCTGAACAGTACGTC       |
| <b>ILK</b>    | Forward       | TGATGAATCGTGGGGATGATACC     |
|               | Reverse       | GCATTGGTGTGAGCCTTGTATT      |
| <b>Itga3</b>  | Forward       | CCTCTTCGGCTACTCGGTC         |
|               | Reverse       | CCGGTTGGTATAGTCATCACCC      |
| <b>Itga6</b>  | Forward       | TGCAGAGGGCGAACAGAAC         |
|               | Reverse       | GCACACGTCACCACTTTGC         |
| <b>Itgb1</b>  | Forward       | TGTTGGTCAGCAACGCATATC       |
|               | Reverse       | CACCAGCAGTCGTGTTACATT       |
| <b>Itgb4</b>  | Forward       | TGGCTACTACACTGTCACGG        |
|               | Reverse       | CAGGGACATCAATGGCCTCC        |
| <b>MKP3</b>   | Forward       | ATAGATACGCTCAGACCCGTG       |
|               | Reverse       | ATCAGCAGAAGCCGTTTCGTT       |
| <b>Notch1</b> | Forward       | TCAATGCCGTGGATGACCTA        |
|               | Reverse       | CCTTGTTGGCTCCGTTCTTC        |
| <b>PppR2b</b> | Forward       | GCTCTGGTCCCGAGATTTTCA       |



|                               |         |                         |
|-------------------------------|---------|-------------------------|
|                               | Reverse | AGATGATGGCGAACAGGAGAA   |
| <b>Pppr2C</b>                 | Forward | CTGCGTGCTTACATCAGGAA    |
|                               | Reverse | TCAGTGGTAAGGCAAATCCA    |
| <b>Rac1</b>                   | Forward | GAGACGGAGCTGTTGGTAAAA   |
|                               | Reverse | ATAGGCCCAAGATTCACTGGTT  |
| <b>RohA</b>                   | Forward | AGCTTGTGGTAAGACATGCTTG  |
|                               | Reverse | GTGTCCATAAAGCCAACCTCTAC |
| <b>SMAD2</b>                  | Forward | ATGTCGTCCATCTTGCCATTC   |
|                               | Reverse | AACCGTCCTGTTTTCTTTAGCTT |
| <b>SMAD3</b>                  | Forward | CCCCACTGGATGACTACAG     |
|                               | Reverse | TCCATCTTCACTCAGGTAGCC   |
| <b>SMAD4</b>                  | Forward | ACACCAACAAGTAACGATGCC   |
|                               | Reverse | GCAAAGGTTTCACTTTCCCA    |
| <b>FAK</b>                    | Forward | CCATGCCCTCGAAAAGCTATG   |
|                               | Reverse | TGACGCATTGTTAAGGCTTCT   |
| <b>Snail1</b>                 | Forward | CACACGCTGCCTTGTGTCT     |
|                               | Reverse | GGTCAGCAAAAGCACGGTT     |
| <b>Snail2</b>                 | Forward | GGCTGCTTCAAGGACACATT    |
|                               | Reverse | TTGGAGCAGTTTTTGCCTG     |
| <b>TGF<math>\alpha</math></b> | Forward | CACTCTGGGTACGTGGGTG     |
|                               | Reverse | CACAGGTGATAATGAGGACAGC  |
| <b>TGF<math>\beta</math>1</b> | Forward | CCGCAACAACGCCATCTATG    |
|                               | Reverse | CTCTGCACGGGACAGCAAT     |
| <b>TGF<math>\beta</math>2</b> | Forward | CTTCGACGTGACAGACGCT     |
|                               | Reverse | GCAGGGGCAGTGTAACCTTATT  |

**Table S3. List of primers used for ChIP**

| Gene          | Promoter region | Amplified region | Strand  | Sequence              |
|---------------|-----------------|------------------|---------|-----------------------|
| <b>EGFR</b>   | Distal          | -2553 to -2705   | Forward | tgacttgccactgacat     |
|               |                 |                  | Reverse | ggtgctcttaccactgagc   |
|               | Proximal-1      | -203 to -399     | Forward | tctcaacctgtgctctgtg   |
|               |                 |                  | Reverse | gggtggccttggagtaat    |
|               | Proximal-2      | -54 to -172      | Forward | ccccagagcctgtctagt    |
|               |                 |                  | Reverse | ggagcgaagaggaggagaat  |
|               | 3'UTR           | 1743 to 1847     | Forward | tctggaagtctcccctgcta  |
|               |                 |                  | Reverse | cactgcaggctctgttttga  |
| <b>Notch1</b> | Distal          | -4484 to -4623   | Forward | gggtgggtaaattgcctcaa  |
|               |                 |                  | Reverse | ctgtgtccacacccttctt   |
|               | Proximal-1      | -8 to -108       | Forward | gttcttagatgccattcca   |
|               |                 |                  | Reverse | atggttcgcaagacaaggag  |
|               | Proximal-2      | +626 to +789     | Forward | tgcgcctctacttttcgatt  |
|               |                 |                  | Reverse | cccgcctctaagtaagcaacg |
|               | 3'UTR           | 4578 to 4728     | Forward | gggaaacaagccaataagca  |
|               |                 |                  | Reverse | tggaggggaaaggagtct    |
| <b>K8</b>     | Distal          | -2180 to -2270   | Forward | aggggagaaagggagagttg  |
|               |                 |                  | Reverse | ctgtgagagaaagcgggaagg |
|               | Proximal-1      | -1489 to -1299   | Forward | atgtgccatagagcagtc    |
|               |                 |                  | Reverse | cacttcagggtgtgatgtgg  |
|               | Proximal-2      | -914 to -753     | Forward | aaagcccctgtgcctctat   |
|               |                 |                  | Reverse | aacgcagctcttctctctgg  |
|               | 3'UTR           | 483 to 642       | Forward | gtgttgggtctgccatttct  |
|               |                 |                  | Reverse | cctccacacacacccttct   |

Note: Amplified region for distal and proximal promoter is relative to the transcription start site of indicated gene and amplified region for 3'UTR is relative to the transcription stop site of indicated gene.
